# Supplementary material for: Climate Change and Jump Dispersal Drive Invasion of the Rosy Wolfsnail (Euglandina rosea) in the United States
Source: MDPI journal article supplement (doi:10.3390/su16051929), 2024-02-27
Supplement: s1 [file s1]

Archive with 2 entries (2 files):
- correlations.xlsx
- ENMWorkflow_112123.pdf
