# Supplementary material for: Climate Change and Jump Dispersal Drive Invasion of the Rosy Wolfsnail (Euglandina rosea) in the United States
Source: MDPI journal article supplement (doi:10.3390/su16051929), 2024-02-27
Supplement: s1 [file s1 › correlations.xlsx]

## Sheet: correlations
	Bio1_annual_heat_moisture_index_tif	Bio2_degree_days_above_5_tif	Bio3_degree_days_above_18_tif	Bio4_degree_days_above10_below40_tif	Bio5_degree_days_below_0_tif	Bio6_degree_days_below_18_tif	Bio7_extreme_max_temp_30_tif	Bio8_extreme_min_temp_30_tif	Bio9_frost_free_period_begins_julian_tif	Bio10_frost_free_period_ends_julian_tif	Bio11_frost_free_period_tif	Bio12_harg_climatic_moisture_index_tif	Bio13_harg_ref_evaporation_tif	Bio14_hogg_climate_moisture_index_tif	Bio15_mean_annual_precip_tif	Bio16_mean_annual_solar_rad_tif	Bio17_mean_annual_temp_tif	Bio18_mean_summer_precipitation_tif	Bio19_mean_temp_coldest_month_tif	Bio20_mean_temp_range_tif	Bio21_mean_temp_warmest_month_tif	Bio22_number_frost_free_days_tif	Bio23_precip_autumn_tif	Bio24_precip_snow_tif	Bio25_precip_spring_tif	Bio26_precip_summer_tif	Bio27_precip_winter_tif	Bio28_relative_humidity_tif	Bio29_summer_heat_moisture_index_tif	Bio30_temp_autumn_tif	Bio31_temp_spring_tif	Bio32_temp_summer_tif	Bio33_temp_winter_tif
Bio1_annual_heat_moisture_index_tif	1	0.607108	0.499512	0.574496	-0.667488	-0.688164	0.723164	0.592982	-0.619134	0.626567	0.629289	0.764816	0.66452	-0.510393	0.00067988	0.691509	0.68603	0.0318065	0.642979	-0.454522	0.705266	0.665728	-0.0319579	-0.162674	0.0308651	0.0320012	-0.00968625	-0.61215	0.586178	0.68514	0.680421	0.697903	0.644165
Bio2_degree_days_above_5_tif	0.607108	1	0.946882	0.99387	-0.73812	-0.878152	0.794901	0.936347	-0.941013	0.954153	0.959624	0.771906	0.970361	-0.502956	0.248975	0.82355	0.92206	0.399422	0.904041	-0.72583	0.887597	0.94115	0.166383	-0.324403	0.282679	0.402148	0.109362	-0.476174	0.256659	0.914931	0.898452	0.895649	0.908555
Bio3_degree_days_above_18_tif	0.499512	0.946882	1	0.974617	-0.548383	-0.712717	0.622954	0.864434	-0.849735	0.859694	0.866292	0.703565	0.867605	-0.478453	0.195344	0.724452	0.783963	0.362899	0.785632	-0.653476	0.744114	0.816297	0.149497	-0.291769	0.193774	0.364678	0.0476863	-0.294512	0.218513	0.780338	0.748544	0.751407	0.790373
Bio4_degree_days_above10_below40_tif	0.574496	0.99387	0.974617	1	-0.676336	-0.828559	0.743447	0.921733	-0.922101	0.93248	0.939501	0.760814	0.946917	-0.507475	0.225353	0.801744	0.882468	0.388699	0.870947	-0.707012	0.845812	0.906596	0.154911	-0.322314	0.246039	0.393033	0.0791185	-0.420939	0.246536	0.876392	0.85469	0.853506	0.875795
Bio5_degree_days_below_0_tif	-0.667488	-0.73812	-0.548383	-0.676336	1	0.968497	-0.854969	-0.78887	0.747328	-0.790549	-0.77463	-0.56892	-0.807878	0.197729	-0.452829	-0.795397	-0.941316	-0.480304	-0.911655	0.747041	-0.876966	-0.852625	-0.338411	0.0681344	-0.521237	-0.457133	-0.364692	0.607946	-0.18082	-0.932591	-0.950534	-0.886967	-0.913113
Bio6_degree_days_below_18_tif	-0.688164	-0.878152	-0.712717	-0.828559	0.968497	1	-0.895711	-0.891328	0.86942	-0.904391	-0.895318	-0.685668	-0.92237	0.33106	-0.399373	-0.850614	-0.9942	-0.468276	-0.965139	0.781134	-0.940087	-0.945501	-0.285994	0.182474	-0.464339	-0.453812	-0.293133	0.613477	-0.229005	-0.984943	-0.992598	-0.949884	-0.967633
Bio7_extreme_max_temp_30_tif	0.723164	0.794901	0.622954	0.743447	-0.854969	-0.895711	1	0.721214	-0.756511	0.786532	0.778143	0.681269	0.838411	-0.466631	0.172257	0.814023	0.887859	0.241801	0.783148	-0.463193	0.967405	0.834413	0.057817	-0.304514	0.307638	0.23008	0.0949958	-0.752219	0.306069	0.892765	0.889072	0.962274	0.788596
Bio8_extreme_min_temp_30_tif	0.592982	0.936347	0.864434	0.921733	-0.78887	-0.891328	0.721214	1	-0.909102	0.966906	0.946982	0.736365	0.929052	-0.360339	0.377972	0.809846	0.921536	0.441059	0.9513	-0.867577	0.809551	0.945099	0.306535	-0.226724	0.384059	0.422268	0.283441	-0.357064	0.278412	0.922763	0.88653	0.820882	0.95339
Bio9_frost_free_period_begins_julian_tif	-0.619134	-0.941013	-0.849735	-0.922101	0.747328	0.86942	-0.756511	-0.909102	1	-0.950564	-0.989879	-0.728349	-0.915342	0.426313	-0.289967	-0.716096	-0.899383	-0.429539	-0.883592	0.722124	-0.852277	-0.955665	-0.214994	0.273966	-0.285199	-0.439878	-0.157327	0.437369	-0.287264	-0.884174	-0.889673	-0.86242	-0.886382
Bio10_frost_free_period_ends_julian_tif	0.626567	0.954153	0.859694	0.93248	-0.790549	-0.904391	0.786532	0.966906	-0.950564	1	0.98454	0.745764	0.939523	-0.417644	0.318443	0.79243	0.932051	0.408371	0.927989	-0.781241	0.867732	0.97324	0.239896	-0.292822	0.338439	0.399967	0.214327	-0.408757	0.301346	0.936761	0.902644	0.876593	0.930446
Bio11_frost_free_period_tif	0.629289	0.959624	0.866292	0.939501	-0.77463	-0.895318	0.778143	0.946982	-0.989879	0.98454	1	0.746023	0.938174	-0.428545	0.306064	0.764227	0.924919	0.425411	0.914657	-0.758624	0.868921	0.975423	0.228683	-0.2862	0.31229	0.42743	0.184367	-0.428752	0.297178	0.918278	0.906195	0.878708	0.917347
Bio12_harg_climatic_moisture_index_tif	0.764816	0.771906	0.703565	0.760814	-0.56892	-0.685668	0.681269	0.736365	-0.728349	0.745764	0.746023	1	0.839124	-0.738998	-0.102369	0.798732	0.714912	-0.032533	0.723743	-0.598319	0.689902	0.753473	-0.115291	-0.322037	-0.0967434	-0.0285686	-0.112707	-0.630338	0.490293	0.701174	0.686373	0.687472	0.723918
Bio13_harg_ref_evaporation_tif	0.66452	0.970361	0.867605	0.946917	-0.807878	-0.92237	0.838411	0.929052	-0.915342	0.939523	0.938174	0.839124	1	-0.536865	0.238918	0.910564	0.949104	0.36516	0.937797	-0.76852	0.902046	0.947542	0.148614	-0.307858	0.284097	0.367276	0.121975	-0.615435	0.282782	0.938796	0.928734	0.909293	0.94082
Bio14_hogg_climate_moisture_index_tif	-0.510393	-0.502956	-0.478453	-0.507475	0.197729	0.33106	-0.466631	-0.360339	0.426313	-0.417644	-0.428545	-0.738998	-0.536865	1	0.68722	-0.422556	-0.366154	0.482409	-0.322423	0.144309	-0.453896	-0.409282	0.72062	0.744439	0.59503	0.398911	0.694126	0.519177	-0.388937	-0.366572	-0.339578	-0.440805	-0.326988
Bio15_mean_annual_precip_tif	0.00067988	0.248975	0.195344	0.225353	-0.452829	-0.399373	0.172257	0.377972	-0.289967	0.318443	0.306064	-0.102369	0.238918	0.68722	1	0.182248	0.383502	0.858856	0.42981	-0.497091	0.239751	0.337987	0.969059	0.621135	0.923287	0.760552	0.917627	0.0633406	-0.185291	0.37074	0.396029	0.260925	0.426551
Bio16_mean_annual_solar_rad_tif	0.691509	0.82355	0.724452	0.801744	-0.795397	-0.850614	0.814023	0.809846	-0.716096	0.79243	0.764227	0.798732	0.910564	-0.422556	0.182248	1	0.860335	0.171894	0.851791	-0.658129	0.821568	0.80001	0.0683729	-0.179375	0.343134	0.130647	0.174078	-0.664438	0.345454	0.86811	0.822676	0.820236	0.853341
Bio17_mean_annual_temp_tif	0.68603	0.92206	0.783963	0.882468	-0.941316	-0.9942	0.887859	0.921536	-0.899383	0.932051	0.924919	0.714912	0.949104	-0.366154	0.383502	0.860335	1	0.469647	0.974803	-0.792153	0.945667	0.961793	0.276197	-0.205648	0.440564	0.45708	0.267298	-0.587877	0.236953	0.991218	0.993094	0.95546	0.977714
Bio18_mean_summer_precipitation_tif	0.0318065	0.399422	0.362899	0.388699	-0.480304	-0.468276	0.241801	0.441059	-0.429539	0.408371	0.425411	-0.032533	0.36516	0.482409	0.858856	0.171894	0.469647	1	0.486278	-0.49791	0.348558	0.411839	0.823139	0.458296	0.732248	0.97602	0.594448	-0.0422785	-0.275747	0.457761	0.491552	0.368041	0.486608
Bio19_mean_temp_coldest_month_tif	0.642979	0.904041	0.785632	0.870947	-0.911655	-0.965139	0.783148	0.9513	-0.883592	0.927989	0.914657	0.723743	0.937797	-0.322423	0.42981	0.851791	0.974803	0.486278	1	-0.904704	0.859718	0.947987	0.335582	-0.152159	0.458252	0.465613	0.33222	-0.498893	0.237388	0.958832	0.958394	0.873952	0.99943
Bio20_mean_temp_range_tif	-0.454522	-0.72583	-0.653476	-0.707012	0.747041	0.781134	-0.463193	-0.867577	0.722124	-0.781241	-0.758624	-0.598319	-0.76852	0.144309	-0.497091	-0.658129	-0.792153	-0.49791	-0.904704	1	-0.5602	-0.781966	-0.439731	-0.0102333	-0.454569	-0.467974	-0.435709	0.249846	-0.162253	-0.769814	-0.766777	-0.584607	-0.899917
Bio21_mean_temp_warmest_month_tif	0.705266	0.887597	0.744114	0.845812	-0.876966	-0.940087	0.967405	0.809551	-0.852277	0.867732	0.868921	0.689902	0.902046	-0.453896	0.239751	0.821568	0.945667	0.348558	0.859718	-0.5602	1	0.905744	0.125305	-0.308127	0.34603	0.344269	0.123596	-0.670478	0.267044	0.941398	0.944184	0.9984	0.864357
Bio22_number_frost_free_days_tif	0.665728	0.94115	0.816297	0.906596	-0.852625	-0.945501	0.834413	0.945099	-0.955665	0.97324	0.975423	0.753473	0.947542	-0.409282	0.337987	0.80001	0.961793	0.411839	0.947987	-0.781966	0.905744	1	0.245759	-0.270132	0.366642	0.403711	0.247634	-0.50456	0.295572	0.950066	0.949466	0.915996	0.949732
Bio23_precip_autumn_tif	-0.0319579	0.166383	0.149497	0.154911	-0.338411	-0.285994	0.057817	0.306535	-0.214994	0.239896	0.228683	-0.115291	0.148614	0.72062	0.969059	0.0683729	0.276197	0.823139	0.335582	-0.439731	0.125305	0.245759	1	0.69318	0.836104	0.712281	0.883967	0.14941	-0.179021	0.264804	0.286385	0.144796	0.331689
Bio24_precip_snow_tif	-0.162674	-0.324403	-0.291769	-0.322314	0.0681344	0.182474	-0.304514	-0.226724	0.273966	-0.292822	-0.2862	-0.322037	-0.307858	0.744439	0.621135	-0.179375	-0.205648	0.458296	-0.152159	-0.0102333	-0.308127	-0.270132	0.69318	1	0.468784	0.373205	0.621381	0.206891	-0.168622	-0.219313	-0.177811	-0.296858	-0.158086
Bio25_precip_spring_tif	0.0308651	0.282679	0.193774	0.246039	-0.521237	-0.464339	0.307638	0.384059	-0.285199	0.338439	0.31229	-0.0967434	0.284097	0.59503	0.923287	0.343134	0.440564	0.732248	0.458252	-0.454569	0.34603	0.366642	0.836104	0.468784	1	0.607668	0.87838	-0.0179619	-0.148209	0.435422	0.44489	0.363501	0.456771
Bio26_precip_summer_tif	0.0320012	0.402148	0.364678	0.393033	-0.457133	-0.453812	0.23008	0.422268	-0.439878	0.399967	0.42743	-0.0285686	0.367276	0.398911	0.760552	0.130647	0.45708	0.97602	0.465613	-0.467974	0.344269	0.403711	0.712281	0.373205	0.607668	1	0.469486	-0.0773899	-0.292272	0.443693	0.484766	0.362935	0.466467
Bio27_precip_winter_tif	-0.00968625	0.109362	0.0476863	0.0791185	-0.364692	-0.293133	0.0949958	0.283441	-0.157327	0.214327	0.184367	-0.112707	0.121975	0.694126	0.917627	0.174078	0.267298	0.594448	0.33222	-0.435709	0.123596	0.247634	0.883967	0.621381	0.87838	0.469486	1	0.113229	-0.0712637	0.252676	0.272136	0.14364	0.326401
Bio28_relative_humidity_tif	-0.61215	-0.476174	-0.294512	-0.420939	0.607946	0.613477	-0.752219	-0.357064	0.437369	-0.408757	-0.428752	-0.630338	-0.615435	0.519177	0.0633406	-0.664438	-0.587877	-0.0422785	-0.498893	0.249846	-0.670478	-0.50456	0.14941	0.206891	-0.0179619	-0.0773899	0.113229	1	-0.254594	-0.567257	-0.616796	-0.661788	-0.500619
Bio29_summer_heat_moisture_index_tif	0.586178	0.256659	0.218513	0.246536	-0.18082	-0.229005	0.306069	0.278412	-0.287264	0.301346	0.297178	0.490293	0.282782	-0.388937	-0.185291	0.345454	0.236953	-0.275747	0.237388	-0.162253	0.267044	0.295572	-0.179021	-0.168622	-0.148209	-0.292272	-0.0712637	-0.254594	1	0.240364	0.209166	0.254784	0.235901
Bio30_temp_autumn_tif	0.68514	0.914931	0.780338	0.876392	-0.932591	-0.984943	0.892765	0.922763	-0.884174	0.936761	0.918278	0.701174	0.938796	-0.366572	0.37074	0.86811	0.991218	0.457761	0.958832	-0.769814	0.941398	0.950066	0.264804	-0.219313	0.435422	0.443693	0.252676	-0.567257	0.240364	1	0.975364	0.948744	0.963321
Bio31_temp_spring_tif	0.680421	0.898452	0.748544	0.85469	-0.950534	-0.992598	0.889072	0.88653	-0.889673	0.902644	0.906195	0.686373	0.928734	-0.339578	0.396029	0.822676	0.993094	0.491552	0.958394	-0.766777	0.944184	0.949466	0.286385	-0.177811	0.44489	0.484766	0.272136	-0.616796	0.209166	0.975364	1	0.955578	0.961394
Bio32_temp_summer_tif	0.697903	0.895649	0.751407	0.853506	-0.886967	-0.949884	0.962274	0.820882	-0.86242	0.876593	0.878708	0.687472	0.909293	-0.440805	0.260925	0.820236	0.95546	0.368041	0.873952	-0.584607	0.9984	0.915996	0.144796	-0.296858	0.363501	0.362935	0.14364	-0.661788	0.254784	0.948744	0.955578	1	0.878485
Bio33_temp_winter_tif	0.644165	0.908555	0.790373	0.875795	-0.913113	-0.967633	0.788596	0.95339	-0.886382	0.930446	0.917347	0.723918	0.94082	-0.326988	0.426551	0.853341	0.977714	0.486608	0.99943	-0.899917	0.864357	0.949732	0.331689	-0.158086	0.456771	0.466467	0.326401	-0.500619	0.235901	0.963321	0.961394	0.878485	1

## Sheet: Sheet1
MAT	mean annual temperature (°C)
MWMT	mean temperature of the warmest month (°C)
MCMT	mean temperature of the coldest month (°C)
TD	difference between MCMT and MWMT, as a measure of continentality (°C)
MAP	mean annual precipitation (mm)
MSP	mean summer (May to Sep) precipitation (mm)
AHM	annual heat moisture index, calculated as (MAT+10)/(MAP/1000)
SHM	summer heat moisture index, calculated as MWMT/(MSP/1000)
DD_0	degree-days below 0°C (chilling degree days)
DD5	degree-days above 5°C (growing degree days)
DD_18	degree-days below 18°C
DD18	degree-days above 18°C
NFFD	the number of frost-free days
FFP	frost-free period
bFFP	the julian date on which the frost-free period begins
eFFP	the julian date on which the frost-free period ends
PAS	precipitation as snow (mm)
EMT	extreme minimum temperature over 30 years
EXT	extreme maximum temperature over 30 years
Eref	Hargreave's reference evaporation
CMD	Hargreave's climatic moisture index
MAR	mean annual solar radiation (MJ m-2 d-1) (excludes areas south of US and some high-latitude areas)
RH	mean annual relative humidity (%)
CMI	Hogg’s climate moisture index (mm)
DD1040	(10<DD<40) degree-days above 10°C and below 40°C
Tave_wt	winter (December to February) mean temperature (°C)
Tave_sp	spring (March to May) mean temperature (°C)
Tave_sm	summer (June to August) mean temperature (°C)
Tave_at	autumn (September to November) mean temperature (°C)
PPT_wt	winter (December to February) precipitation (mm)
PPT_sp	spring (March to May) precipitation (mm)
PPT_sm	summer (June to August) precipitation (mm)
PPT_at	autumn (September to November) precipitation (mm)
