# Supplementary material for: Climate Change and Jump Dispersal Drive Invasion of the Rosy Wolfsnail (Euglandina rosea) in the United States
Source: MDPI journal article supplement (doi:10.3390/su16051929), 2024-02-27
Supplement: s1 [file s1 › ENMWorkflow_112123.pdf]

| Workflow                                     | Category   | Necessary Reporting                         | Method Used                                                                              | Details                                                                                                                                                                                                                                                                     | Citation                                                                                                                                                                                                                                                                                                                                                              |
|----------------------------------------------|------------|---------------------------------------------|------------------------------------------------------------------------------------------|-----------------------------------------------------------------------------------------------------------------------------------------------------------------------------------------------------------------------------------------------------------------------------|-----------------------------------------------------------------------------------------------------------------------------------------------------------------------------------------------------------------------------------------------------------------------------------------------------------------------------------------------------------------------|
| (A) Obtaining and processing occurrence data | metadata   | (A1) source of occurrence data              | GBIF                                                                                     | We utilized the Global Biodiversity Information Facility (GBIF) to assess the current and predicted future distribution of <i>E. rosea</i> in the United States. A total of 1,879 records were downloaded on November 12, 2023.                                             | GBIF.org (12 November 2023) GBIF Occurrence Download <a href="https://doi.org/10.15468/dl.9th8ab">https://doi.org/10.15468/dl.9th8ab</a>                                                                                                                                                                                                                              |
|                                              |            | (A2) download date; version of data source  | creation date (11/12/2023 2:11:28 AM), simple tab-separated values (TSV) download format |                                                                                                                                                                                                                                                                             |                                                                                                                                                                                                                                                                                                                                                                       |
|                                              |            | (A3) basis of records                       | Human Observation (presence only)                                                        | These records were checked for accuracy and quality and are considered reliable observations in the large majority of cases (Maldonado et al. 2015).                                                                                                                        | Maldonado C, Molina CI, Zizka A, Persson C, Taylor CM, Albán J, Chilquillo E, Rønsted N, Antonelli A (2015) Estimating species diversity and distribution in the era of Big Data: To what extent can we trust public databases? <i>Global Ecology and Biogeography</i> 24: 973–984. <a href="https://doi.org/10.1111/geb.12326">https://doi.org/10.1111/geb.12326</a> |
|                                              |            | (A4) spatial extent                         | Contiguous United States                                                                 | Our environmental datasets spanned the entirety of North America. Occurrences outside the extent of our environmental layers are irrelevant for the purpose of this study which aims to investigate <i>E. rosea</i> 's potential range expansion via natural dispersal.     | Barve, N., V. Barve, A. Jiménez-Valverde, A. Lira-Noriega, S. P. Maher, A. T. Peterson, J. Soberón, and F. Villalobos. 2011. The crucial role of the accessible area in ecological niche modeling and species distribution modeling. <i>Ecological Modelling</i> 222: 1810–1819.                                                                                      |
|                                              |            | (A5) temporal range                         | 2011-2023                                                                                |                                                                                                                                                                                                                                                                             |                                                                                                                                                                                                                                                                                                                                                                       |
|                                              | processing | (A6-1) duplicate coordinates                | Deleted                                                                                  | 447 duplicated points were removed. (1,432 total)                                                                                                                                                                                                                           | Radosavljevic, A., and R. P. Anderson. 2014. Making better Maxent models of species distributions: complexity, overfitting and evaluation. <i>Journal of Biogeography</i> 41: 629–643.                                                                                                                                                                                |
|                                              |            | (A6-2) spatial/environmental outlier; error | Outliers manually removed                                                                | <i>E. rosea</i> observations were plotted in ArcGIS pro. Any unusual points falling far outside the population cluster were investigated. Two occurrence records were located in commercial garden centers in Ohio and New York and removed from our dataset. (1,430 total) |                                                                                                                                                                                                                                                                                                                                                                       |

|                                                 |                       |                                            |                                                                                                                                                                                                                                                                  |                                                                                                                                                                                                                                                                                                                                                   |                                                                                                                                                                                                                                                                  |
|-------------------------------------------------|-----------------------|--------------------------------------------|------------------------------------------------------------------------------------------------------------------------------------------------------------------------------------------------------------------------------------------------------------------|---------------------------------------------------------------------------------------------------------------------------------------------------------------------------------------------------------------------------------------------------------------------------------------------------------------------------------------------------|------------------------------------------------------------------------------------------------------------------------------------------------------------------------------------------------------------------------------------------------------------------|
|                                                 |                       | (A6-3) spatial/coordinate uncertainty      | 1000 meters or fewer uncertainty                                                                                                                                                                                                                                 | The recorded coordinates of a data point may not necessarily correspond to its exact collection location due to differences in specificity levels. To ensure accuracy, we removed all data points with coordinate specificity greater than 1000 meters. In total, 383 occurrence record were removed due to inadequate specificity. (1,047 total) |                                                                                                                                                                                                                                                                  |
|                                                 |                       | (A7-1) sampling bias                       | Spatial Thinning                                                                                                                                                                                                                                                 | In order to mitigate the impact of sampling bias, we applied a spatial filter to the occurrence dataset to ensure that no two locations were within a 10 km radius of each other. 473 localities shared the same grid cell. (574 total)                                                                                                           |                                                                                                                                                                                                                                                                  |
| (B) Obtaining and processing environmental data | metadata & processing | (B1) source                                | AdaptWest Project. 2022. Gridded current and projected climate data for North America at 1km resolution, generated using the ClimateNA v7.30 software (T. Wang et al., 2022). Available at <a href="https://adaptwest.databasin.org">adaptwest.databasin.org</a> | Current and projected climate data were acquired from the Adapt West Project (AdaptWest Project 2022), comprising 33 parameters evaluated for their relevance in predicting E. rosea presence.                                                                                                                                                    | AdaptWest Project. 2022. Gridded current and projected climate data for North America at 1km resolution, generated using the ClimateNA v7.30 software (T. Wang et al., 2022). Available at <a href="https://adaptwest.databasin.org">adaptwest.databasin.org</a> |
|                                                 |                       | (B2) download date; version of data source | 11/11/2023                                                                                                                                                                                                                                                       |                                                                                                                                                                                                                                                                                                                                                   |                                                                                                                                                                                                                                                                  |
|                                                 |                       | (B3) spatial resolution                    | 1km resolution                                                                                                                                                                                                                                                   | (0.015485, 0.015485)(x,y)                                                                                                                                                                                                                                                                                                                         |                                                                                                                                                                                                                                                                  |
|                                                 |                       | (B4) temporal range                        | 2000-2020                                                                                                                                                                                                                                                        |                                                                                                                                                                                                                                                                                                                                                   |                                                                                                                                                                                                                                                                  |
|                                                 |                       |                                            | 2021-2040                                                                                                                                                                                                                                                        |                                                                                                                                                                                                                                                                                                                                                   |                                                                                                                                                                                                                                                                  |
|                                                 |                       |                                            |                                                                                                                                                                                                                                                                  |                                                                                                                                                                                                                                                                                                                                                   |                                                                                                                                                                                                                                                                  |
| (C) Model calibration                           | data input            | (C1) number of background data             | 10000                                                                                                                                                                                                                                                            | For each geographical background we selected 10,000 random cells that did not hold a species presence record.                                                                                                                                                                                                                                     | Phillips, S. J., R. P. Anderson, and R. E. Schapire. 2006. Maximum entropy modeling of species geographic distributions. Ecological Modelling 190:231-259.                                                                                                       |

|  |           |                                          |                                                              |                                                                                                                                                                                                                                                                                                                                                                                  |                                                                                                                                                                                                                                                                                                                                                                                                                                                     |
|--|-----------|------------------------------------------|--------------------------------------------------------------|----------------------------------------------------------------------------------------------------------------------------------------------------------------------------------------------------------------------------------------------------------------------------------------------------------------------------------------------------------------------------------|-----------------------------------------------------------------------------------------------------------------------------------------------------------------------------------------------------------------------------------------------------------------------------------------------------------------------------------------------------------------------------------------------------------------------------------------------------|
|  |           | (C2) sampling method for background data | Random Seed, crossvalidate                                   | By selecting "random seed" a different random sample will be used to for valudating the model                                                                                                                                                                                                                                                                                    | Jarnevich, C. S., Talbert, M., Morisette, J., Aldridge, C., Brown, C. S., Kumar, S., Manier, D., Talbert, C., & Holcombe, T. (2017). Minimizing effects of methodological decisions on interpretation and prediction in species distribution studies: An example with background selection. <i>Ecological Modelling</i> , 363, 48–56. <a href="https://doi.org/10.1016/j.ecolmodel.2017.08.017">https://doi.org/10.1016/j.ecolmodel.2017.08.017</a> |
|  |           | (C3) variable selection                  | Bio26, Bio27, Bio33                                          | All 33 bioclimatic layers were analyzed for their relatedness using the R-package “ENMeval” and a correlation matrix was generated using the function “raster.cor.matrix” (Kass et al. 2021). The results of this matrix allowed us to determine which variables could be disregarded because they contributed mostly redundant data to our model and could lead to overfitting. | Kass, J. M., Muscarella, R., Galante, P. J., Bohl, C. L., Pinilla-Buitrago, G. E., Boria, R. A., Soley-Guardia, M., & Anderson, R. P. (2021). ENMeval 2.0: Redesigned for customizable and reproducible modeling of species’ niches and distributions. <i>Methods in Ecology and Evolution</i> , 12(9), 1602–1608. <a href="https://doi.org/10.1111/2041-210X.13628">https://doi.org/10.1111/2041-210X.13628</a>                                    |
|  | algorithm | (C4) name                                | Maximum Entropy Modeling of Species Geographic Distributions | ENM was performed using the maximum entropy approach as implemented in MAXENT 3.4.4 (Phillips, Anderson, & Schapire, 2006).                                                                                                                                                                                                                                                      | Steven J. Phillips, Miroslav Dudík, Robert E. Schapire. [Internet] Maxent software for modeling species niches and distributions (Version 3.4.1). Available from url: <a href="http://biodiversityinformatics.amnh.org/open_source/maxent/">http://biodiversityinformatics.amnh.org/open_source/maxent/</a> . Accessed on 2023-11-17.                                                                                                               |
|  |           | (C5) version of algorithm and software   | MaxEnt 3.4.4                                                 |                                                                                                                                                                                                                                                                                                                                                                                  |                                                                                                                                                                                                                                                                                                                                                                                                                                                     |
|  |           | (C6) parameterization                    | ENMevaluate                                                  | The optimal model parameters were tuned using the function ENMevaluate in the package ENMeval for R. Within AENMevaluate we evaluated models with the following feature classes: linear, quadratic, product and, and hinge and regularization multipliers between 0.5 and 3.                                                                                                     | Muscarella, R., Galante, P. J., Soley-Guardia, M., Boria, R. A., Kass, J. M., Uriarte, M., & Anderson, R. P. (2014). ENMeval: An R package for conducting spatially independent evaluations and estimating optimal model complexity for Maxent ecological niche models . <i>Methods in Ecology and Evolution</i> , 5(11), 1198–1205. <a href="https://doi.org/10.1111/2041-210x.12261">https://doi.org/10.1111/2041-210x.12261</a>                  |
|  |           |                                          |                                                              |                                                                                                                                                                                                                                                                                                                                                                                  |                                                                                                                                                                                                                                                                                                                                                                                                                                                     |

|                                   |               |                                                                            |                                 |                                                                                                                                                                                                                                                                                    |                                                                                                                                                                                                                                                                                                                                              |
|-----------------------------------|---------------|----------------------------------------------------------------------------|---------------------------------|------------------------------------------------------------------------------------------------------------------------------------------------------------------------------------------------------------------------------------------------------------------------------------|----------------------------------------------------------------------------------------------------------------------------------------------------------------------------------------------------------------------------------------------------------------------------------------------------------------------------------------------|
| (D) Model transfer and evaluation | evaluation    | (D1) evaluation index                                                      | AUC                             | We evaluated the performance of the models by two different methods using a randomized subset of occurrences for model evaluation: (a) an omission error test and (b) the receiver operating characteristic (ROC) curve                                                            | Boyce, M.S., P.R. Vernier, S.E. Nielsen and F.K.A. Schmiegelow. 2002. Evaluating resource selection functions. <i>Ecol. Model.</i> , 157, 281-300. Hirzel, A.H., G. Le Lay, V. Helfer, C. Randin and A. Guisan. 2006. Evaluating the ability of habitat suitability models to predict species presences. <i>Ecol. Model.</i> , 199, 142-152. |
|                                   |               | (D2) threshold for evaluation index                                        | 10% train/test omission rate.   | Threshold at 10% to create the binary suitability map, we expect the omission rate in the test data to be 10%. Higher omission in the testing data reflects over-fitting (noise and/or bias).                                                                                      | Radosavljevic, A., and R. P. Anderson. 2014. Making better Maxent models of species distributions: complexity, overfitting and evaluation. <i>Journal of Biogeography</i> 41: 629–643.                                                                                                                                                       |
|                                   |               | (D3) dataset used to evaluate models                                       | random partitioning             | default in MaxEnt                                                                                                                                                                                                                                                                  |                                                                                                                                                                                                                                                                                                                                              |
|                                   | output        | (D4) format/transformation                                                 | logistic                        | we used the logistic output format                                                                                                                                                                                                                                                 |                                                                                                                                                                                                                                                                                                                                              |
|                                   |               | (D5) threshold                                                             | 10 percentile training presence | we repeated this procedure 10 times for each algorithm and used the Lowest Present Threshold values (Pearson et al., 2007) to transform each map in binary.                                                                                                                        |                                                                                                                                                                                                                                                                                                                                              |
|                                   | extrapolation | (D6) novelty of projected environments compared with training environments | MaxEnt(MESS)                    | MaxEnt conducted multivariate environmental similarity surfaces (MESS) analysis to assess the effect of model extrapolation on values of predictor variables lying outside the training range, that is, projecting models on non-analogous climates, following Elith et al. (2011) |                                                                                                                                                                                                                                                                                                                                              |
|                                   |               | (D7) collinearity shift between training and projected environments        | NA                              | NA                                                                                                                                                                                                                                                                                 |                                                                                                                                                                                                                                                                                                                                              |
|                                   |               | (D8) extrapolation strategy                                                | Extrapolate and no clamping     | ten replicates of each model were conducted by extrapolation and no clamping.                                                                                                                                                                                                      |                                                                                                                                                                                                                                                                                                                                              |
